# Supplementary material
Source: PubMed Central journal article supplement (PMC6892369)
Supplement: 41591_2018_224_MOESM1_ESM.pdf [file 41591_2018_224_MOESM1_ESM.pdf]

In the format provided by the authors and unedited.

# A patient-level pooled analysis of treatment-shortening regimens for drug-susceptible pulmonary tuberculosis

Marjorie Z. Imperial<sup>1,11</sup>, Payam Nahid<sup>1,11</sup>, Patrick P. J. Phillips<sup>1</sup>, Geraint R. Davies<sup>2</sup>, Katherine Fielding<sup>3</sup>, Debra Hanna<sup>4,5</sup>, David Hermann<sup>5</sup>, Robert S. Wallis<sup>6</sup>, John L. Johnson<sup>7,8</sup>, Christian Lienhardt<sup>9,10</sup> and Rada M. Savic<sup>10</sup> <sup>1\*</sup>

<sup>1</sup>University of California, San Francisco, San Francisco, CA, USA. <sup>2</sup>University of Liverpool, Liverpool, UK. <sup>3</sup>London School of Hygiene and Tropical Medicine, London, UK. <sup>4</sup>Critical Path Institute, Tucson, AZ, USA. <sup>5</sup>Bill and Melinda Gates Foundation, Seattle, WA, USA. <sup>6</sup>Aurum Institute and ACT4TB/HIV, Johannesburg, South Africa. <sup>7</sup>Case Western Reserve University, Cleveland, OH, USA. <sup>8</sup>University Hospitals Cleveland Medical Center, Cleveland, OH, USA. <sup>9</sup>Global Tuberculosis Programme, World Health Organization, Geneva, Switzerland. <sup>10</sup>Unité Mixte Internationale TransVIHMI (UMI 233 IRD-U1175 INSERM-Université de Montpellier), Institut de Recherche pour le Développement (IRD), Montpellier, France. <sup>11</sup>These authors contributed equally: Marjorie Z. Imperial, Payam Nahid. \*e-mail: [rada.savic@ucsf.edu](mailto:rada.savic@ucsf.edu)

1 **Supplementary Appendix**  
2 **Supplement to: Imperial M, Nahid P, et al. A Patient-Level Pooled Analysis of Treatment**  
3 **Shortening Regimens for Drug-Susceptible Pulmonary Tuberculosis**

4  
5  
6

## 1 **Summary of Sensitivity/Additional Analyses**

2 The following sensitivity and additional analyses were performed:

- 3 1. Multivariate Cox proportional hazard analysis in PP analysis population (Table S6)
- 4 2. Univariate Cox proportional hazard analysis in modified intent-to-treat analysis populations  
5 (Table S8)
- 6 3. Multivariate Cox proportional hazard analysis with cavitation status included *a priori* (Table S9  
7 and Table S10).
- 8 4. Multivariate Cox proportional hazard analysis with inclusion of all mycobacterial interspersed  
9 repetitive unit (MIRU)-confirmed reinfections, classified as unfavorable (Table S11) or  
0 favorable, or completely removed from the analysis. Results were similar in all analyses.
- 1 5. Univariate Cox proportional hazard analysis for merged mycobacteria growth indicator tube  
2 system (MGIT) and Lowenstein-Jensen (LJ) culture data (as used in primary analysis), MGIT  
3 data only, and LJ data only. Results were similar in all analyses (Table S12).
- 4 6. Multivariate Cox proportional hazard analysis of impact of adherence with cut-off for total  
5 number of doses of at least 130 (exact number of doses if participant took 5/7 doses for 26  
6 weeks) for the REMoxTB and RIFAQUIN analysis and 120 (exact number of doses if  
7 participant took 5/7 doses for 24 weeks) for the OFLOTUB analysis. Results and conclusions  
8 were similar when compared to the original analysis with a cutoff of at least 112 total doses.
- 9 7. Multivariate Cox proportional hazard analysis with events defined as TB related outcomes and  
0 all other outcomes censored (details on definition of TB related outcome in Table S1). Results  
1 were similar when compared to primary analysis in which events included all trial defined  
2 unfavorable outcomes.
- 3 8. Univariate Cox proportional hazard analysis with X-Ray Measurements (collection details  
4 available in Table S2; results available in Figure S1 and Figure S2)

5

1 **Supplemental Figure 1. Univariate Cox proportional hazard analysis with X-Ray measurements**  
 2 **in the MITT analysis population for the experimental group.** Measurements collected at baseline  
 3 are shown in the top panel and measurements collected at the end of treatment are shown in the  
 4 bottom panel. Cavity size at baseline was collected in the RIFAQUIN trial. Disease Extent, Disease  
 5 Grade, and Lung Zone Score was collected in the OFLOTUB trial. Hazard ratios with 95% Wald  
 6 confidence interval are reported.

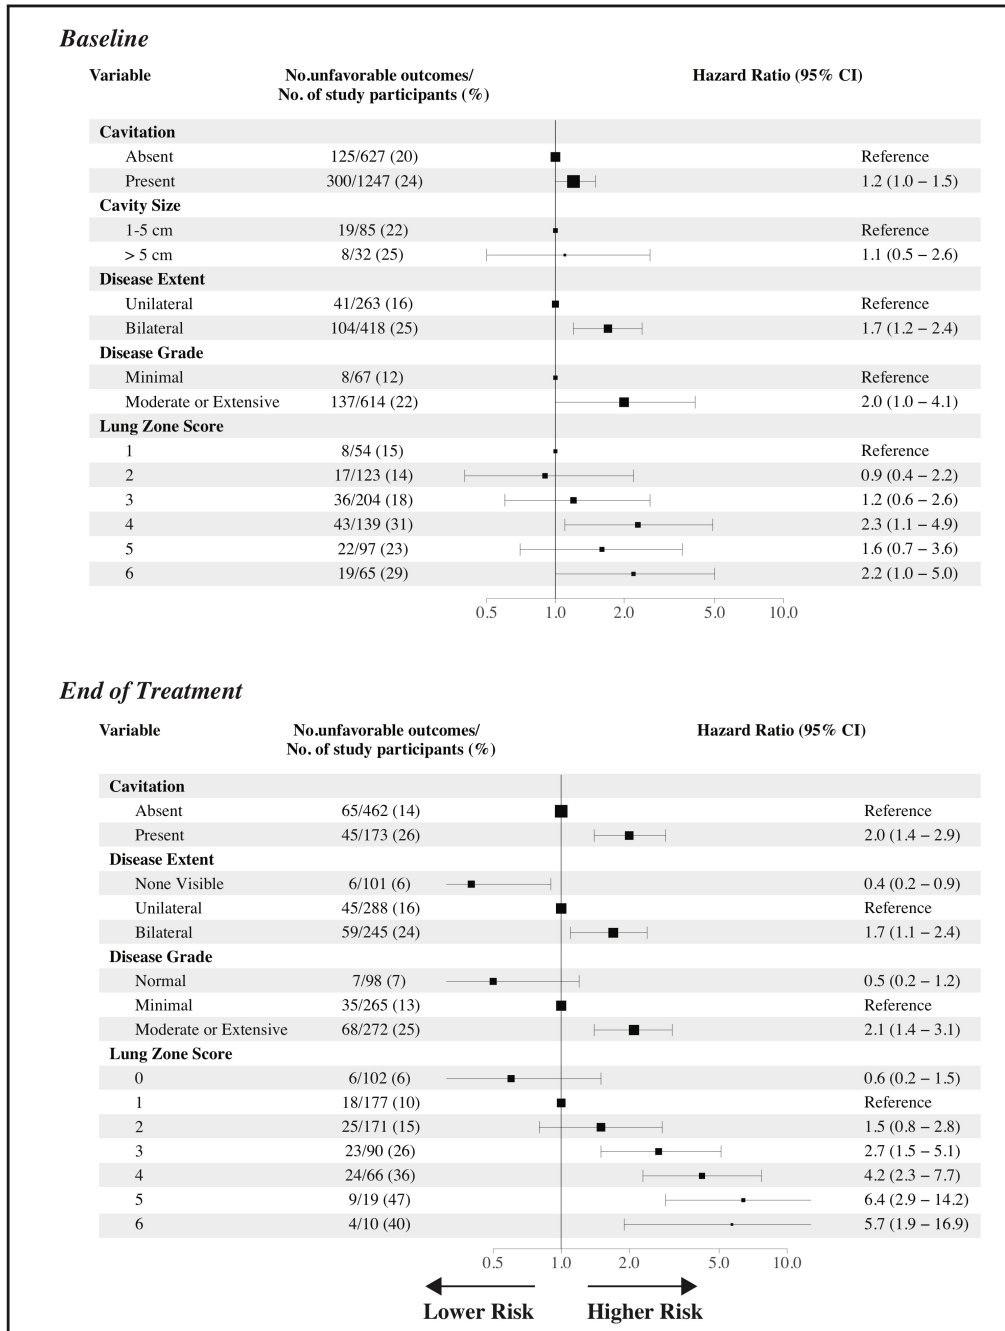

1 **Supplemental Figure 2. Univariate Cox proportional hazard analysis with X-Ray measurements**  
 2 **in the MITT analysis population for the control group.** Measurements collected at baseline are  
 3 shown in the top panel and measurements collected at the end of treatment are shown in the bottom  
 4 panel. Cavity size at baseline was collected in the RIFAQUIN trial. Disease Extent, Disease Grade,  
 5 and Lung Zone Score was collected in the OFLOTUB trial. Hazard ratios with 95% Wald confidence  
 6 interval are reported.

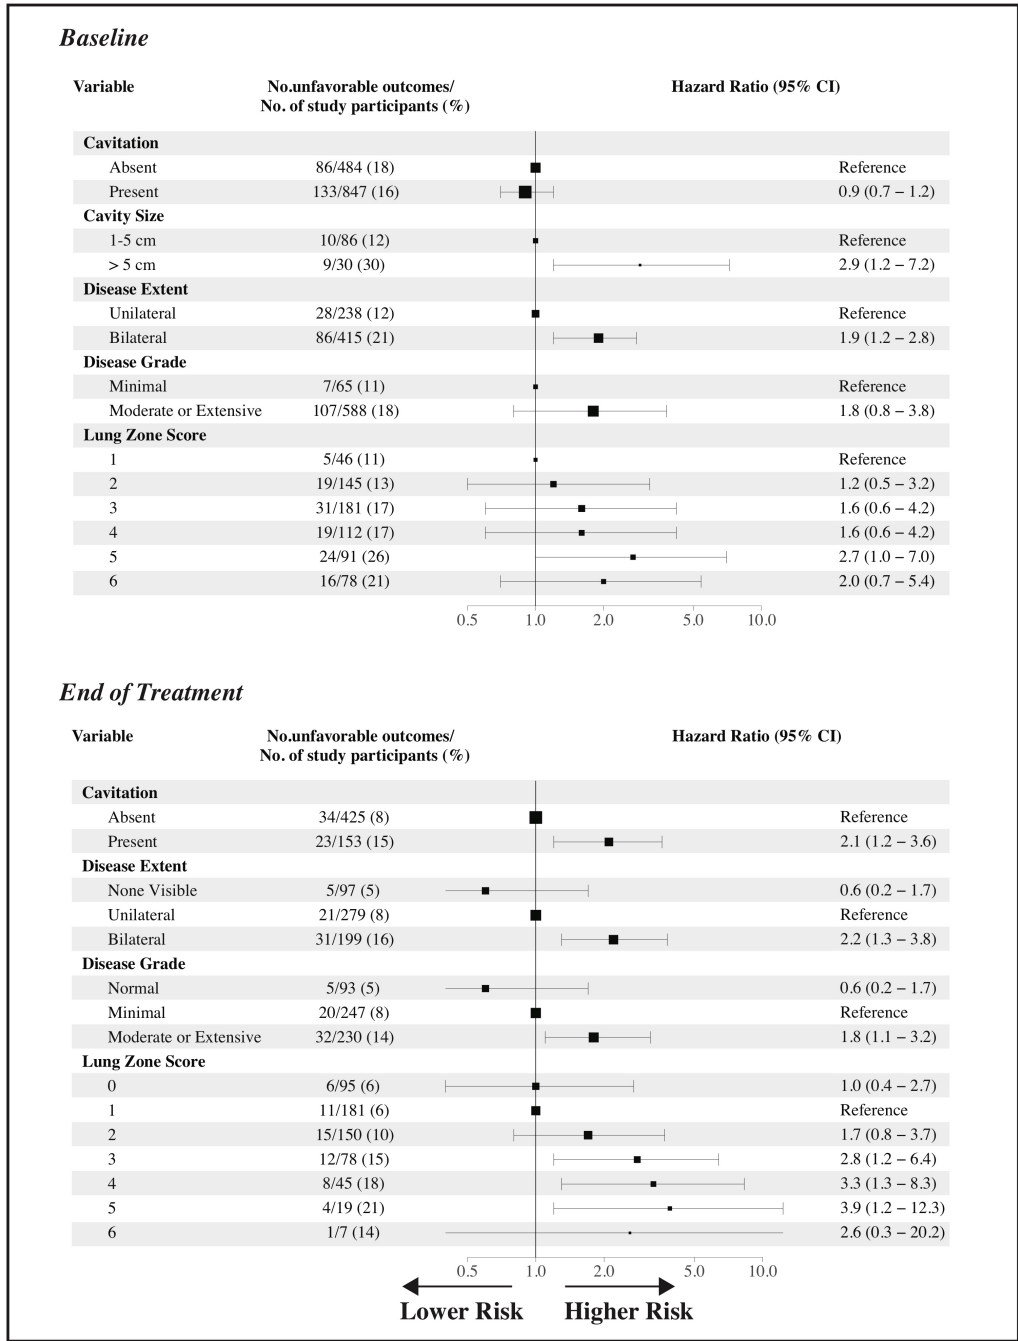

1 **Supplementary Figure 3. Correlation matrix based on Spearman coefficient between variables**  
 2 **of interest.** In the top right half of the figure, a saturated blue box suggests a strong positive  
 3 correlation (Spearman coefficients goes toward 1) and a saturated red box suggest a strong negative  
 4 correlation (Spearman coefficients goes toward -1) between two variables. Bottom left half of the  
 5 figure show Spearman coefficients between two variables. NA: Correlation not applicable.

6

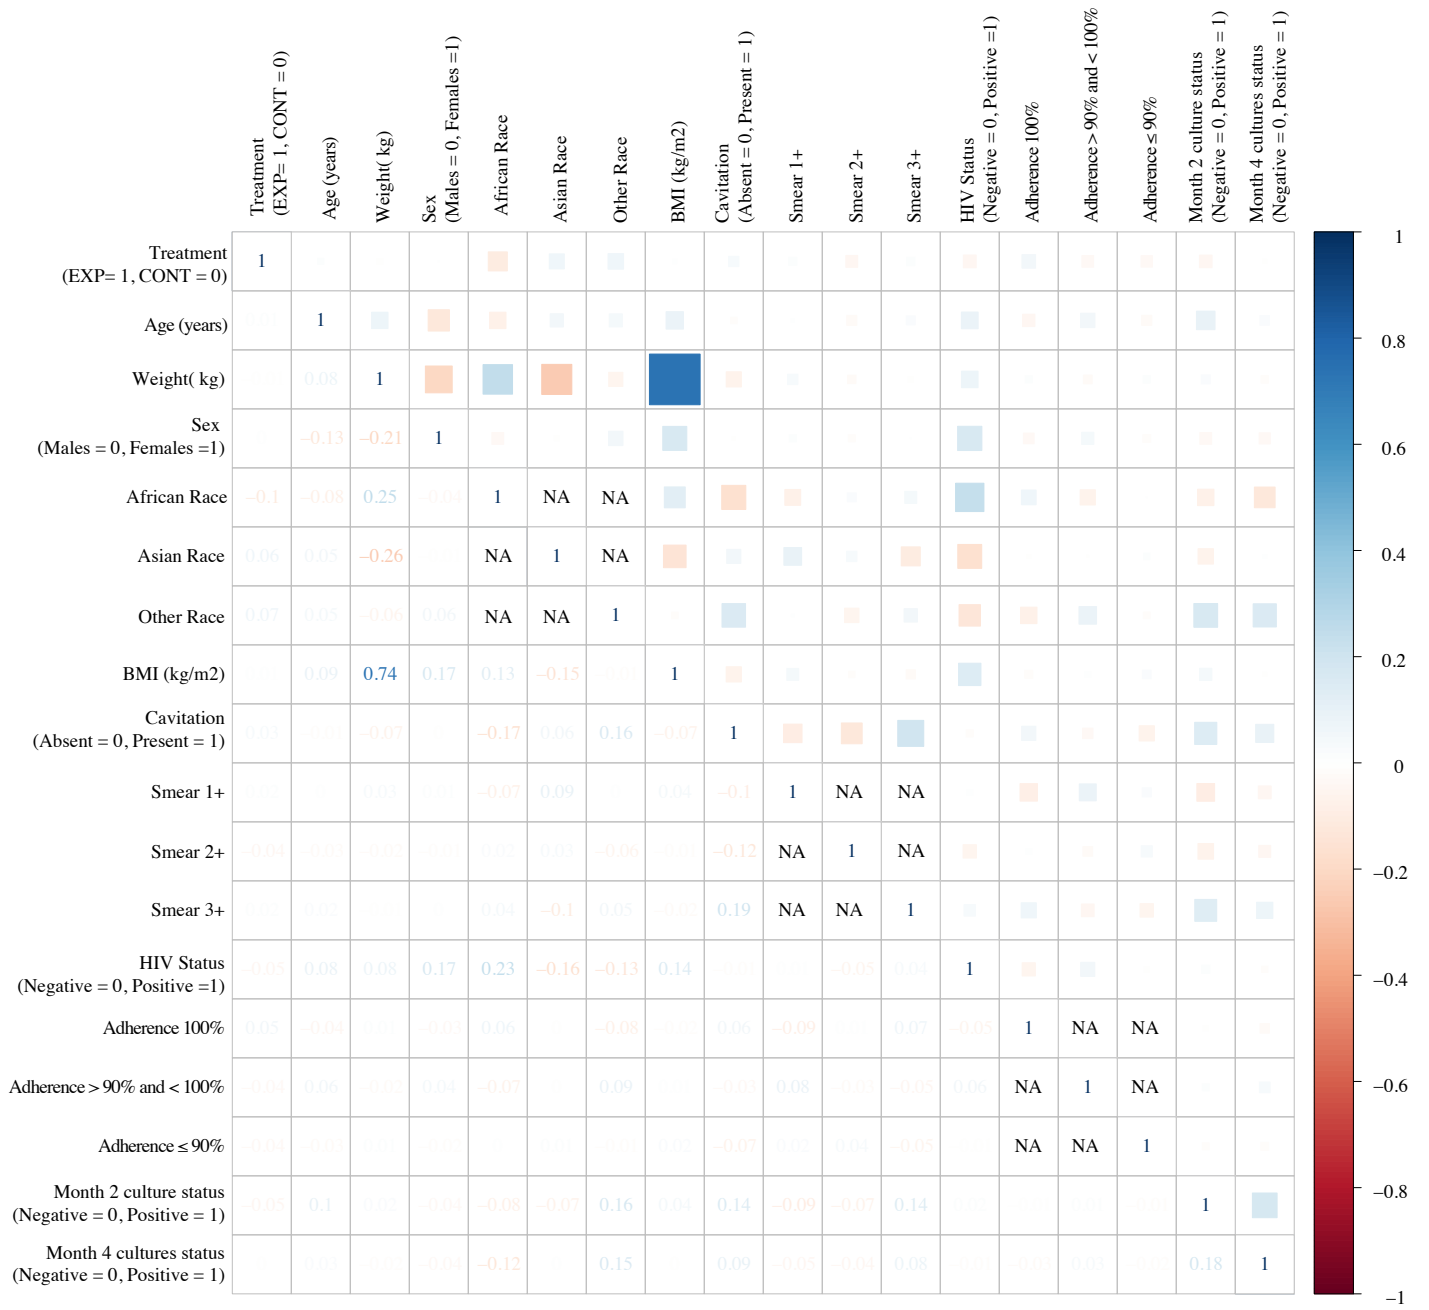

7

1 **Supplemental Table 1. Definitions of favorable and unfavorable outcomes per clinical trial.**  
2 Outcomes defined as favorable are shown in green and outcomes defined as unfavorable are shown  
3 in red. Refer to trial protocols for exact criteria/definition for each outcome category. N refers to  
4 number of study participants in MITT analysis population\*\* with corresponding outcome.

| <b>Trial</b>                                                            | <b>Outcome</b>                                                               | <b>N</b>             |
|-------------------------------------------------------------------------|------------------------------------------------------------------------------|----------------------|
| <b>OFLOTUB</b>                                                          | Favorable                                                                    | 1090*                |
|                                                                         | By end of treatment, died                                                    | 14                   |
|                                                                         | By end of treatment, adverse event                                           | 2                    |
|                                                                         | By end of treatment, drop-out                                                | 52                   |
|                                                                         | By end of treatment, consent withdrawn                                       | 16                   |
|                                                                         | By end of treatment, treatment failure <sup>‡</sup>                          | 28                   |
|                                                                         | After end of treatment, TB-recurrence, two positive culture <sup>†,‡</sup>   | 119                  |
|                                                                         | After end of treatment, TB-recurrence, one positive culture <sup>†,‡</sup>   | 21                   |
|                                                                         | After end of treatment, culture negative/unk <sup>‡</sup>                    | 8                    |
| <b>REMoxTB</b>                                                          | Culture-negative status at 18 mo.                                            | 1166                 |
|                                                                         | Unable to produce sputum                                                     | 2                    |
|                                                                         | Unable to produce sputum at 18 mo. But culture negative status earlier       | 115                  |
|                                                                         | Missing data on LJ culture at 18 mo. And MGIT negative                       | 40                   |
|                                                                         | 6-mo. treatment phase <sup>†</sup> , nonviolent death                        | 18                   |
|                                                                         | 6 mo. treatment phase, adverse reaction                                      | 42                   |
|                                                                         | 6 mo. treatment phase, withdrawal of consent                                 | 34                   |
|                                                                         | 6 mo. treatment phase, relocation                                            | 10                   |
|                                                                         | 6 mo. treatment phase, other investigator decision                           | 7                    |
|                                                                         | 6 mo. treatment phase, no completion of treatment                            | 29                   |
|                                                                         | 6-mo. treatment phase, treatment failure, culture confirmed <sup>‡</sup>     | 8                    |
|                                                                         | 6 mo. treatment phase, treatment failure, not culture confirmed <sup>‡</sup> | 9                    |
|                                                                         | Follow up, relapse after culture negative status <sup>‡</sup>                | 123                  |
|                                                                         | Follow up, retreated for tuberculosis <sup>‡</sup>                           | 59                   |
|                                                                         | Follow up, no culture negative status ever <sup>‡</sup>                      | 3                    |
|                                                                         | Follow up, no culture negative status at last visit <sup>‡</sup>             | 7                    |
| Follow up, death from tuberculosis or respiratory distress <sup>‡</sup> | 2                                                                            |                      |
| <b>RIFAQUIN</b>                                                         | Favorable                                                                    | 302                  |
|                                                                         | During treatment, death                                                      | 1                    |
|                                                                         | During treatment, change in treatment due to adverse event                   | 3                    |
|                                                                         | During treatment, lost to follow up                                          | 11                   |
|                                                                         | During treatment, inadequate treatment                                       | 3                    |
|                                                                         | During treatment, other treatment change                                     | 21                   |
|                                                                         | During treatment, failure (culture confirmed) <sup>‡</sup>                   | 4                    |
|                                                                         | After treatment, relapse, culture confirmation <sup>‡</sup>                  | 23                   |
|                                                                         | After treatment, relapse, limited bacteriologic confirmation <sup>‡</sup>    | 10                   |
|                                                                         | After treatment, culture positive when last seen <sup>‡</sup>                | 2                    |
|                                                                         | After treatment, death due to tuberculosis <sup>‡</sup>                      | 1                    |
|                                                                         | <b>DMID 01-009**</b>                                                         | Microbiological cure |
| Clinical cure                                                           |                                                                              | 28                   |
| Bacteriological relapse <sup>‡</sup>                                    |                                                                              | 18                   |
| Death                                                                   |                                                                              | 4                    |
| Lost to follow up                                                       |                                                                              | 9                    |
| Other                                                                   |                                                                              | 1                    |

\*Six study participants were excluded due inability to verify treatment allocation in source database

† In the REMoxTB trial, treatment phase was defined as 32 weeks after randomization.

‡ smear positive/symptoms

<sup>¶</sup>Sixteen TB-recurrences included in the primary analysis for the OFLOTUB trial were MIRU confirmed reinfections

<sup>¶</sup>Included in TB related outcome definition.

<sup>\*\*</sup>For DMID 01-009 trial, data corresponds to time to event analysis population from original publication.

1

2

3



1 Supplemental Table 2. Dataset specification and harmonization

| Variable      | Data Type and Format                                                                                                                                                                                                                                                    | Collected? |         |          |            | No. participants with missing data (%*) | Included in primary analysis? | Notes                                                                                                                                                                                                              |
|---------------|-------------------------------------------------------------------------------------------------------------------------------------------------------------------------------------------------------------------------------------------------------------------------|------------|---------|----------|------------|-----------------------------------------|-------------------------------|--------------------------------------------------------------------------------------------------------------------------------------------------------------------------------------------------------------------|
|               |                                                                                                                                                                                                                                                                         | OFLOTUB    | REMOxTB | RIFAQUIN | DMID01-009 |                                         |                               |                                                                                                                                                                                                                    |
| Study country | Categorical:<br>1-Benin,<br>2-Botswana<br>3-China,<br>4-Guinea,<br>5-India,<br>6-Kenya,<br>7-Mexico,<br>8-Malaysia,<br>9-Senegal,<br>10- Thailand,<br>11-Tanzania,<br>12-South Africa,<br>13-Zambia,<br>14-Zimbabwe,<br>101- Uganda,<br>102- Philippines,<br>103-Brazil | Yes        | Yes     | Yes      | Yes        | 0 (0)                                   | Yes                           |                                                                                                                                                                                                                    |
| Age           | Number (units, years)                                                                                                                                                                                                                                                   | Yes        | Yes     | Yes      | Yes        | 5 (<1)                                  | Yes                           |                                                                                                                                                                                                                    |
| Sex           | Boolean:<br>0-Female,<br>1- Male                                                                                                                                                                                                                                        | Yes        | Yes     | Yes      | Yes        | 0 (0)                                   | Yes                           |                                                                                                                                                                                                                    |
| Race          | Categorical:<br>1-Black,<br>2-Asian,<br>3-Other                                                                                                                                                                                                                         | No         | Yes     | Yes      | No         | 1736 (46)                               | Yes                           | Black race was assigned to all study participants in OFLOTUB trial, given all OFLOTUB sites were in Africa. Race was not a significant risk factor in primary analysis, therefore, was not imputed for validation. |

|                       |                                    |                        |                        |                        |                        |                                      |     |                                                                                                                                                                                                                                                                                                                                                                                                                                                                                                                                                                                             |
|-----------------------|------------------------------------|------------------------|------------------------|------------------------|------------------------|--------------------------------------|-----|---------------------------------------------------------------------------------------------------------------------------------------------------------------------------------------------------------------------------------------------------------------------------------------------------------------------------------------------------------------------------------------------------------------------------------------------------------------------------------------------------------------------------------------------------------------------------------------------|
| Weight                | Number (units, kg)                 | Yes                    | Yes                    | Yes                    | Yes                    | 0 (0)                                | No  | Not included in primary analysis because of correlation with BMI (Figure S1)                                                                                                                                                                                                                                                                                                                                                                                                                                                                                                                |
| Body mass index (BMI) | Number (units, kg/m <sup>2</sup> ) | Calculated - see notes | Calculated - see notes | Calculated - see notes | Calculated - see notes | 291(8) with missing height-see notes | Yes | Body mass index was defined as the weight in kilograms divided by the squared height in meters. Height was not available for 291 study participants in the RIFAQUIN trial, median height from available data was assigned according to sex.                                                                                                                                                                                                                                                                                                                                                 |
| HIV status            | Boolean: 0-negative, 1-positive    | Yes                    | Yes                    | Yes                    | Yes                    | 9 (<1)                               | Yes | According to original trial protocols, OFLOTUB trial excluded participants who required concomitant anti-infective treatment or HIV infected participants with WHO stage 3 infection (except those presenting with only the "loss of weight>10% body weight" criterion) and all participants at WHO stage 4, REMoxTB trial excluded HIV infected participants already receiving anti-retroviral therapy or CD4 count less than 250 cells/ $\mu$ L, RIFAQUIN trial excluded HIV infected participants who required anti-retroviral therapy at diagnosis (amended to "already receiving anti- |

|                                         |                                                                      |     |     |     |       |            |     |                                                                                                                                                                                                                      |
|-----------------------------------------|----------------------------------------------------------------------|-----|-----|-----|-------|------------|-----|----------------------------------------------------------------------------------------------------------------------------------------------------------------------------------------------------------------------|
|                                         |                                                                      |     |     |     |       |            |     | retroviral therapy” during course of trial) or CD4 cell count less than 200 cells/ $\mu$ L (amended to 150 cells/ $\mu$ L during course of trial), and DMID 01-009 trial excluded all HIV infected participants.     |
| Baseline CD4 cell count                 | Number (units, cells/ $\mu$ L)                                       | Yes | Yes | Yes | NA    | 79 (17 †)  | No  | See notes for HIV status                                                                                                                                                                                             |
| Smoking                                 | Categorical:<br>0-No,<br>1-Before,<br>2-Ongoing                      | No  | Yes | Yes | No    | 1736 (46)  | No  |                                                                                                                                                                                                                      |
| Alcohol Use                             | Boolean:<br>0-No,<br>1-Yes                                           | No  | No  | No  | Yes   | 3405 (90)  | No  |                                                                                                                                                                                                                      |
| Drug Use                                | Boolean:<br>0-No,<br>1-Yes                                           | No  | No  | No  | Yes   | 3405 (90)  | No  |                                                                                                                                                                                                                      |
| Pharmacogenomics (Isoniazid acetylator) | NA                                                                   | No  | No  | No  | No    | 3791 (100) | No  |                                                                                                                                                                                                                      |
| Baseline cough                          | Boolean:<br>0-No,<br>1-Yes                                           | Yes | Yes | No  | Yes   | 381 (10)   | No  | Cough grade data was available in REMoxTB trial. Cough data during treatment and follow-up available in DMID 01-009 trial.                                                                                           |
| Baseline smear grade ††                 | Categorical:<br>1-Smear negative or 1+,<br>2-Smear 2+,<br>3-Smear 3+ | Yes | Yes | Yes | Yes   | 43 (1)     | Yes | A conversion chart available in the REMoxTB trial lab manual was used to readjust all smear data to the same grading scale (Additional details in Supplementary Methods). Longitudinal data available in all trials. |
| Baseline cavitation ††                  | Boolean:<br>0-Absent,                                                | Yes | Yes | Yes | Yes ‡ | 200 (5)    | Yes | Follow-up data available in OFLOTUB trial.                                                                                                                                                                           |

|                                                                                           |                                                                                       |     |     |        |       |                                            |                             |                                                                       |
|-------------------------------------------------------------------------------------------|---------------------------------------------------------------------------------------|-----|-----|--------|-------|--------------------------------------------|-----------------------------|-----------------------------------------------------------------------|
|                                                                                           | 1-Present                                                                             |     |     |        |       |                                            |                             |                                                                       |
| Baseline cavity size ††                                                                   | Categorical:<br>0- 1-5 cm,<br>1- >5 cm                                                | No  | No  | Yes    | Yes ∫ | 1861 (89 ¶)                                | No                          |                                                                       |
| Baseline lung disease grade ††                                                            | Categorical:<br>0-Normal,<br>1-Minimal,<br>2-Moderately Advanced,<br>3-Far Advanced   | Yes | No  | No     | Yes   | 2057 (54)                                  | No                          | Follow-up data available in OFLOTUB and DMID 01-009 trials.           |
| Baseline lung disease extent ††                                                           | Categorical:<br>0-None Visible,<br>1-Unilateral<br>2-Bilateral                        | Yes | No  | No     | No    | 2458 (65)                                  | No                          | Follow-up data available in OFLOTUB and DMID 01-009 trials.           |
| Baseline lung zone score ††                                                               | Categorical:<br>Factors 0 to 6;<br>0-no area affected,<br>6-all lung regions affected | Yes | No  | No     | No    | 2457 (65)                                  | No                          | Follow up data available in OFLOTUB trial.                            |
| On-treatment culture status based on LJ medium ††                                         | Boolean:<br>0-Negative<br>1-Positive                                                  | Yes | Yes | Yes II | Yes   | Month 2: 524 (14)<br>Month 4: 348 (19**)   | No                          | Longitudinal data available in all trials.                            |
| On-treatment culture status based on MGIT medium ††                                       | Boolean:<br>0-Negative<br>1-Positive                                                  | No  | Yes | Yes II | No    | Month 2: 2094 (55)<br>Month 4: 1187 (66**) | No                          | Longitudinal data available in all trials                             |
| On-treatment culture status based on LJ or MGIT medium (data used in primary analysis) †† | Boolean:<br>0-Negative<br>1-Positive                                                  | Yes | Yes | Yes    | Yes   | Month 2: 308 (8)<br>Month 4: 236 (13**)    | Month 2- Yes<br>Month 4- No | Longitudinal data available in all trials                             |
| Drug regimen                                                                              | Categorical:<br>See description of                                                    | Yes | Yes | Yes    | Yes   | 6 (<1)                                     | No                          | Six study participants were excluded from the current analyses due to |

|                     |                                                                      |                        |                        |                        |     |                                                          |     |                                                                                                                                                                                                                                                                                                                                                                                      |
|---------------------|----------------------------------------------------------------------|------------------------|------------------------|------------------------|-----|----------------------------------------------------------|-----|--------------------------------------------------------------------------------------------------------------------------------------------------------------------------------------------------------------------------------------------------------------------------------------------------------------------------------------------------------------------------------------|
|                     | study arms in original protocols, methods, and supplementary methods |                        |                        |                        |     |                                                          |     | untraceable regimen assignment in the source database.                                                                                                                                                                                                                                                                                                                               |
| Drug Dose           | Number:<br>See description in original protocols                     | Yes                    | Yes                    | Yes                    | Yes | 6 (<1)                                                   | No  | Six study participants were excluded from the current analyses due inability to verify treatment allocation in source database.                                                                                                                                                                                                                                                      |
| Treatment Adherence | Number (units, %)                                                    | Calculated - see notes | Calculate d- see notes | Calculated - see notes | No  | 83 (2 ∫ ∫ )                                              | Yes | Treatment adherence was calculated as the number of days that doses were taken divided by the prescribed number of days.                                                                                                                                                                                                                                                             |
| Pharmacokinetics    | Number:<br>See description in original protocols                     | Sub-study              | No                     | Sub-study              | No  | 3207 (86)                                                | No  |                                                                                                                                                                                                                                                                                                                                                                                      |
| Drug Resistance     | Categorical:<br>See description in original protocols                | Yes                    | Yes                    | Yes                    | Yes | Variable-based on exclusion/inclusion criteria-see notes | No  | According to original trial protocols, OFLOTUB trial withdrew participants resistant to rifampin, REMoxTB trial excluded participants resistant to rifampin or any fluoroquinolone, RIFAQUIN trial excluded individuals resistant to rifampin, isoniazid, or moxifloxacin, and DMID 01-009 trial, excluded individuals resistant to rifampin, isoniazid, ethambutol or pyrazinamide. |

|                                                                                                                                                                                                                                                                                                                                                                                                                                                                                                                                                                                                                                                           |  |  |  |  |  |  |  |  |
|-----------------------------------------------------------------------------------------------------------------------------------------------------------------------------------------------------------------------------------------------------------------------------------------------------------------------------------------------------------------------------------------------------------------------------------------------------------------------------------------------------------------------------------------------------------------------------------------------------------------------------------------------------------|--|--|--|--|--|--|--|--|
|                                                                                                                                                                                                                                                                                                                                                                                                                                                                                                                                                                                                                                                           |  |  |  |  |  |  |  |  |
| <p>* Percentage based on entire population, which included 3405 participants from REMoxTB, RIFAQUIN, OFLOTUB and 386 from DMID 01-009 studies.</p> <p>† Percentage based on HIV infected population.</p> <p>∫ DMID 01-009 study population were non-cavitary disease adults.</p> <p>¶ Percentage based on study participants with cavitary disease.</p> <p>   Study site specific.</p> <p>** Percentage based on 6-month control population only.</p> <p>†† Worst outcomes used for analysis if multiple samples available.</p> <p>∫ ∫ Missing population and percentage based on REMoxTB, RIFAQUIN, OFLOTUB datasets only.</p> <p>NA- not applicable</p> |  |  |  |  |  |  |  |  |

1

1 **Supplemental Table 3. Summary of analysis populations with complete records of predefined predictors.**

|                           |             | Total No. of participants | No. of participants with complete records of baseline predictors (% of total)* | No. Participants with complete records of baseline and on-treatment predictors (% of total)* |
|---------------------------|-------------|---------------------------|--------------------------------------------------------------------------------|----------------------------------------------------------------------------------------------|
| <b>Experimental Group</b> | <b>MITT</b> | 2001                      | 1843 (92)                                                                      | 1668 (83)                                                                                    |
|                           | <b>PP</b>   | 1851                      | 1711 (92)                                                                      | 1615 (87)                                                                                    |
| <b>Control Group</b>      | <b>MITT</b> | 1404                      | 1311 (93)                                                                      | 1186 (84)                                                                                    |
|                           | <b>PP</b>   | 1271                      | 1189 (94)                                                                      | 1127 (89)                                                                                    |

2 \*Baseline predictors include age, race, BMI, sex, presence of cavitation and smear grade. On-treatment predictors included adherence and month 2  
3 culture status. Complete record defined after (1) black race was assigned for all participants in the OFLOTUB trial, in which race information was  
4 not available, given that all OFLOTUB sites were in Africa and similar demographic characteristics were observed in other studies at their African  
5 sites (majority black) and (2) median height for females and males of available data was used for 291 participants with missing height to calculate  
6 BMI.  
7

1 **Supplemental Table 4. Multivariate Cox proportional hazard analysis in MITT analysis**  
 2 **population for experimental group.** Multivariate results for **a.** baseline predictors and **b.** baseline  
 3 and on-treatment predictors.

4 **a.**

| Variable                   | N unfavorable/ N assessable (%)                        | Hazard Ratio (95% CI) | P value   |
|----------------------------|--------------------------------------------------------|-----------------------|-----------|
| Female                     | 90/549 (16)                                            | Reference             | Reference |
| Male                       | 326/1294 (25)                                          | 1.6 (1.3 - 2.1)       | <0.001    |
| Smear neg. or 1+           | 81/443 (18)                                            | Reference             | Reference |
| Smear 2+                   | 104/481 (22)                                           | 1.2 (0.9 - 1.7)       | 0.17      |
| Smear 3+                   | 231/919 (25)                                           | 1.4 (1.1 - 1.9)       | 0.007     |
| HIV negative               | 352/1615 (22)                                          | Reference             | Reference |
| HIV positive               | 64/228 (28)                                            | 1.4 (1.1 - 1.9)       | 0.01      |
| Age (per 10 year increase) | < 30 years, 179/916 (20%)<br>≥ 30 years, 237/927 (26%) | 1.1 (1.0 - 1.2)       | 0.02      |
| South Africa               | 192/770 (25)                                           | Reference             | Reference |
| Benin                      | 29/120 (24)                                            | 0.9 (0.6 - 1.4)       | 0.71      |
| Botswana                   | 2/11 (18)                                              | 0.8 (0.2 - 3.1)       | 0.71      |
| China                      | 3/12 (25)                                              | 1.3 (0.4 - 4.2)       | 0.63      |
| Guinea                     | 24/188 (13)                                            | 0.5 (0.3 - 0.8)       | 0.002     |
| India                      | 45/182 (25)                                            | 1.1 (0.8 - 1.5)       | 0.68      |
| Kenya                      | 30/151 (20)                                            | 0.8 (0.5 - 1.1)       | 0.16      |
| Malaysia                   | 17/43 (40)                                             | 2.0 (1.2 - 3.3)       | 0.008     |
| Senegal                    | 29/127 (23)                                            | 0.8 (0.6 - 1.2)       | 0.34      |
| Thailand                   | 7/65 (11)                                              | 0.4 (0.2 - 0.9)       | 0.02      |
| Tanzania                   | 17/91 (19)                                             | 0.8 (0.5 - 1.2)       | 0.27      |
| Zambia                     | 9/26 (35)                                              | 1.3 (0.7 - 2.6)       | 0.42      |
| Zimbabwe                   | 12/57 (21)                                             | 0.8 (0.4 - 1.4)       | 0.35      |

5  
6

**b.**

| Variable                  | N unfavorable/ N assessable (%) | Hazard Ratio (95% CI) | P value   |
|---------------------------|---------------------------------|-----------------------|-----------|
| Adherence 100%            | 238/1348 (18)                   | Reference             | Reference |
| Adherence > 90% and <100% | 64/288 (22)                     | 1.4 (1.0 - 1.9)       | 0.03      |
| Adherence ≤ 90%           | 15/32 (47)                      | 5.7 (3.3 - 9.9)       | <0.001    |
| Month 2 culture negative  | 212/1357 (16)                   | Reference             | Reference |
| Month 2 culture positive  | 105/311 (34)                    | 2.2 (1.7 - 2.9)       | <0.001    |
| Females                   | 64/492 (13)                     | Reference             | Reference |
| Males                     | 253/1176 (22)                   | 1.6 (1.2 - 2.1)       | <0.001    |
| Smear neg. or 1+          | 53/388 (14)                     | Reference             | Reference |
| Smear 2+                  | 72/430 (17)                     | 1.2 (0.8 - 1.7)       | 0.41      |
| Smear 3+                  | 192/850 (23)                    | 1.6 (1.2 - 2.3)       | 0.002     |



|                                        |                                                                                  |                 |           |
|----------------------------------------|----------------------------------------------------------------------------------|-----------------|-----------|
| HIV negative                           | 270/1463 (18)                                                                    | Reference       | Reference |
| HIV positive                           | 47/205 (23)                                                                      | 1.5 (1.1 - 2.0) | 0.02      |
| BMI (per 5 kg/m <sup>2</sup> decrease) | ≥ 17 kg/m <sup>2</sup> , 226/1247 (18%)<br>< 17 kg/m <sup>2</sup> , 91/421 (22%) | 1.4 (1.1 - 1.7) | 0.007     |
| Age (per 10 year increase)             | < 30 years, 136/830 (16%)<br>≥ 30 years, 181/838 (22%)                           | 1.1 (1.0 - 1.2) | 0.04      |
| South Africa                           | 150/702 (21)                                                                     | Reference       | Reference |
| Benin                                  | 19/107 (18)                                                                      | 0.9 (0.5 - 1.4) | 0.53      |
| Botswana                               | 2/11 (18)                                                                        | 1.2 (0.3 - 4.8) | 0.81      |
| China                                  | 2/10 (20)                                                                        | 1.4 (0.3 - 5.7) | 0.64      |
| Guinea                                 | 17/174 (10)                                                                      | 0.5 (0.3 - 0.8) | 0.003     |
| India                                  | 25/129 (19)                                                                      | 1.0 (0.6 - 1.6) | 1.0       |
| Kenya                                  | 26/145 (18)                                                                      | 1.0 (0.6 - 1.5) | 0.84      |
| Malaysia                               | 13/39 (33)                                                                       | 2.4 (1.3 - 4.4) | 0.003     |
| Senegal                                | 26/123 (21)                                                                      | 1.0 (0.6 - 1.6) | 0.96      |
| Thailand                               | 6/64 (9)                                                                         | 0.6 (0.3 - 1.3) | 0.2       |
| Tanzania                               | 12/84 (14)                                                                       | 0.7 (0.4 - 1.3) | 0.24      |
| Zambia                                 | 9/25 (36)                                                                        | 1.8 (0.9 - 3.6) | 0.09      |
| Zimbabwe                               | 10/55 (18)                                                                       | 0.8 (0.4 - 1.5) | 0.5       |

1

2

1 **Supplemental Table 5. Multivariate Cox proportional hazard analysis in MITT analysis**

2 **population for control group.** Multivariate results for **a.** baseline predictors and **b.** baseline and on-  
 3 treatment predictors.

4 **a.**

| Variable                               | N unfavorable/ N assessable (%)                                                 | Hazard Ratio (95% CI) | P value   |
|----------------------------------------|---------------------------------------------------------------------------------|-----------------------|-----------|
| HIV negative                           | 159/1103 (14)                                                                   | Reference             | Reference |
| HIV positive                           | 54/208 (26)                                                                     | 2.3 (1.6 - 3.3)       | <0.001    |
| Female                                 | 47/381 (12)                                                                     | Reference             | Reference |
| Male                                   | 166/930 (18)                                                                    | 1.5 (1.1 - 2.1)       | 0.03      |
| Age (per 10 year increase)             | < 30 years, 92/657 (14%)<br>≥ 30 years, 121/654 (19%)                           | 1.3 (1.1 - 1.4)       | <0.001    |
| BMI (per 5 kg/m <sup>2</sup> decrease) | ≥ 17 kg/m <sup>2</sup> , 156/989 (16%)<br>< 17 kg/m <sup>2</sup> , 57/322 (18%) | 1.3 (1.0 - 1.7)       | 0.04      |
| South Africa                           | 80/491 (16)                                                                     | Reference             | Reference |
| Benin                                  | 25/106 (24)                                                                     | 1.4 (0.9 - 2.2)       | 0.17      |
| Botswana                               | 0/11 (0)                                                                        | NA                    | NA        |
| China                                  | 0/8 (0)                                                                         | NA                    | NA        |
| Guinea                                 | 32/179 (18)                                                                     | 1.2 (0.8 - 1.9)       | 0.36      |
| India                                  | 18/93 (19)                                                                      | 1.5 (0.9 - 2.5)       | 0.16      |
| Kenya                                  | 18/115 (16)                                                                     | 1.1 (0.6 - 1.8)       | 0.8       |
| Malaysia                               | 5/19 (26)                                                                       | 2.4 (1.0 - 6.0)       | 0.06      |
| Senegal                                | 16/137 (12)                                                                     | 0.7 (0.4 - 1.3)       | 0.31      |
| Thailand                               | 5/34 (15)                                                                       | 1.0 (0.4 - 2.5)       | 0.99      |
| Tanzania                               | 4/53 (8)                                                                        | 0.5 (0.2 - 1.4)       | 0.18      |
| Zambia                                 | 1/18 (6)                                                                        | 0.3 (0.0 - 2.3)       | 0.25      |
| Zimbabwe                               | 9/47 (19)                                                                       | 1.2 (0.6 - 2.5)       | 0.53      |

5 **b.**

| Variable                               | N unfavorable/ N assessable (%)                                                 | Hazard Ratio (95% CI) | P value   |
|----------------------------------------|---------------------------------------------------------------------------------|-----------------------|-----------|
| Adherence 100%                         | 85/913 (9)                                                                      | Reference             | Reference |
| Adherence > 90% and <100%              | 37/230 (16)                                                                     | 2.4 (1.6 - 3.6)       | <0.001    |
| Adherence ≤ 90%                        | 16/43 (37)                                                                      | 5.9 (3.3 - 10.5)      | <0.001    |
| HIV negative                           | 98/999 (10)                                                                     | Reference             | Reference |
| HIV positive                           | 40/187 (21)                                                                     | 3.1 (2.0 - 4.6)       | <0.001    |
| Month 2 culture negative               | 93/922 (10)                                                                     | Reference             | Reference |
| Month 2 culture positive               | 45/264 (17)                                                                     | 1.8 (1.3 - 2.7)       | 0.002     |
| BMI (per 5 kg/m <sup>2</sup> decrease) | ≥ 17 kg/m <sup>2</sup> , 102/901 (11%)<br>< 17 kg/m <sup>2</sup> , 36/285 (13%) | 1.5 (1.0 - 2.0)       | 0.03      |

|              |              |                 |           |
|--------------|--------------|-----------------|-----------|
| Females      | 30/347 (9)   | Reference       | Reference |
| Males        | 108/839 (13) | 1.5 (1.0 - 2.4) | 0.05      |
| South Africa | 57/454 (13)  | Reference       | Reference |
| Benin        | 13/90 (14)   | 1.4 (0.7 - 2.7) | 0.3       |
| Botswana     | 0/7 (0)      | NA              | NA        |
| China        | 0/7 (0)      | NA              | NA        |
| Guinea       | 21/164 (13)  | 1.0 (0.6 - 1.7) | 1         |
| India        | 7/68 (10)    | 1.4 (0.6 - 3.1) | 0.46      |
| Kenya        | 14/110 (13)  | 1.6 (0.9 - 2.9) | 0.14      |
| Malaysia     | 3/17 (18)    | 2.9 (0.9 - 9.4) | 0.08      |
| Senegal      | 12/128 (9)   | 1.1 (0.6 - 2.2) | 0.74      |
| Thailand     | 2/31 (6)     | 1.0 (0.2 - 4.1) | 0.98      |
| Tanzania     | 4/52 (8)     | 0.8 (0.3 - 2.2) | 0.63      |
| Zambia       | 1/18 (6)     | 0.6 (0.1 - 4.4) | 0.61      |
| Zimbabwe     | 4/40 (10)    | 0.4 (0.2 - 1.3) | 0.13      |

1

1 **Supplemental Table 6. Multivariate Cox proportional hazard analysis in PP analysis**

2 **population.** Multivariate results with baseline and on-treatment predictors for **a.** experimental group  
 3 study participants and **b.** control group study participants.

4 **a.**

| Variable                               | N unfavorable/ N assessable (%)                                                | Hazard Ratio (95% CI) | P value   |
|----------------------------------------|--------------------------------------------------------------------------------|-----------------------|-----------|
| Month 2 culture negative               | 182/1315 (14)                                                                  | Reference             | Reference |
| Month 2 culture positive               | 94/300 (31)                                                                    | 2.4 (1.9 - 3.2)       | <0.001    |
| Female                                 | 53/477 (11)                                                                    | Reference             | Reference |
| Male                                   | 223/1138 (20)                                                                  | 1.8 (1.3 - 2.4)       | <0.001    |
| Smear neg. or 1+                       | 46/376 (12)                                                                    | Reference             | Reference |
| Smear 2+                               | 59/414 (14)                                                                    | 1.1 (0.8 - 1.7)       | 0.59      |
| Smear 3+                               | 171/825 (21)                                                                   | 1.6 (1.1 - 2.3)       | 0.006     |
| HIV negative                           | 233/1415 (16)                                                                  | Reference             | Reference |
| HIV positive                           | 43/200 (22)                                                                    | 1.6 (1.1 - 2.2)       | 0.008     |
| BMI (per 5 kg/m <sup>2</sup> decrease) | ≥ 17 kg/m <sup>2</sup> : 196/1207 (16)<br>< 17 kg/m <sup>2</sup> : 80/408 (20) | 1.4 (1.1 - 1.8)       | 0.004     |
| South Africa                           | 132/680 (19)                                                                   | Reference             | Reference |
| Benin                                  | 14/100 (14)                                                                    | 0.8 (0.5 - 1.5)       | 0.5       |
| Botswana                               | 2/11 (18)                                                                      | 1.5 (0.4 - 6.0)       | 0.59      |
| China                                  | 1/9 (11)                                                                       | 1.0 (0.1 - 7.0)       | 0.97      |
| Guinea                                 | 12/164 (7)                                                                     | 0.4 (0.2 - 0.8)       | 0.006     |
| India                                  | 24/128 (19)                                                                    | 1.1 (0.7 - 1.7)       | 0.7       |
| Kenya                                  | 23/142 (16)                                                                    | 0.9 (0.5 - 1.3)       | 0.49      |
| Malaysia                               | 11/37 (30)                                                                     | 2.7 (1.4 - 5.1)       | 0.003     |
| Senegal                                | 26/122 (21)                                                                    | 1.1 (0.7 - 1.8)       | 0.59      |
| Thailand                               | 4/62 (6)                                                                       | 0.5 (0.2 - 1.3)       | 0.16      |
| Tanzania                               | 8/80 (10)                                                                      | 0.5 (0.2 - 1.0)       | 0.06      |
| Zambia                                 | 9/25 (36)                                                                      | 1.8 (0.9 - 3.6)       | 0.09      |
| Zimbabwe                               | 10/55 (18)                                                                     | 1.1 (0.6 - 2.1)       | 0.83      |

5 **b.**  
 6

| Variable                 | N unfavorable/ N assessable (%) | Hazard Ratio (95% CI) | P value   |
|--------------------------|---------------------------------|-----------------------|-----------|
| Adherence 100%           | 73/901 (8)                      | Reference             | Reference |
| Adherence >90% and <100% | 21/208 (10)                     | 1.8 (1.1 - 3.0)       | 0.02      |
| Adherence ≤ 90%          | 4/18 (22)                       | 3.8 (1.3 - 10.7)      | 0.01      |
| HIV negative             | 71/956 (7)                      | Reference             | Reference |
| HIV positive             | 27/171 (16)                     | 3.3 (2.0 - 5.5)       | <0.001    |
| Month 2 culture negative | 61/874 (7)                      | Reference             | Reference |
| Month 2 culture positive | 37/253 (15)                     | 2.5 (1.6 - 3.9)       | <0.001    |

|              |             |                  |           |
|--------------|-------------|------------------|-----------|
| Female       | 18/332 (5)  | Reference        | Reference |
| Male         | 80/795 (10) | 2.2 (1.3 - 3.8)  | 0.003     |
| South Africa | 42/437 (10) | Reference        | Reference |
| Benin        | 5/80 (6)    | 0.9 (0.3 - 2.4)  | 0.87      |
| Botswana     | 0/7 (0)     | NA               | NA        |
| China        | 0/7 (0)     | NA               | NA        |
| Guinea       | 15/146 (10) | 1.8 (0.9 - 3.5)  | 0.09      |
| India        | 6/67 (9)    | 2.0 (0.8 - 4.9)  | 0.13      |
| Kenya        | 11/107 (10) | 1.7 (0.9 - 3.5)  | 0.13      |
| Malaysia     | 2/16 (12)   | 2.7 (0.6 - 11.6) | 0.17      |
| Senegal      | 11/126 (9)  | 1.6 (0.7 - 3.4)  | 0.23      |
| Thailand     | 1/30 (3)    | 0.7 (0.1 - 5.1)  | 0.72      |
| Tanzania     | 3/51 (6)    | 0.8 (0.3 - 2.7)  | 0.74      |
| Zambia       | 1/18 (6)    | 0.8 (0.1 - 5.6)  | 0.78      |
| Zimbabwe     | 1/35 (3)    | 0.3 (0.0 - 2.0)  | 0.2       |

1  
2

1 **Supplementary Table 7. Analysis of 7/7 and 6/7 dosing strategies and impact of adherence in**  
2 **the control group.** Multivariate analysis with total number of doses taken for study participants who  
3 took at least 4 months of treatment under 7/7 dosing strategies for 26 weeks (REMOxTB and  
4 RIFAQUIN trials). **b.** Multivariate analysis with total number of doses taken for study participants who  
5 took at least 4 months of treatment under 6/7 dosing strategies for 24 weeks (OFLOTUB trial).

6 **a.**

| Variable                              | N unfavorable/ N assessable (%)                     | Hazard Ratio (95% CI) | P value   |
|---------------------------------------|-----------------------------------------------------|-----------------------|-----------|
| 182 (7 doses per week)                | 26/452 (6)                                          | Reference             | Reference |
| 156-181 (on average 6 doses per week) | 22/217 (10)                                         | 2.4 (1.3 - 4.3)       | 0.004     |
| 112-155 (on average 5 doses per week) | 13/18 (72)                                          | 28.9 (10.5 - 80.0)    | <0.001    |
| Treatment duration (per week)         | < 182 days, 21/110 (19%)<br>≥ 182 days, 40/577 (7%) | 0.9 (0.8 - 1.1)       | 0.25      |
| South Africa                          | 37/342 (11)                                         | Reference             | Reference |
| Botswana                              | 0/12 (0)                                            | NA                    | NA        |
| China                                 | 0/8 (0)                                             | NA                    | NA        |
| India                                 | 11/102 (11)                                         | 1.6 (0.8 - 3.1)       | 0.22      |
| Kenya                                 | 0/37 (0)                                            | NA                    | NA        |
| Malaysia                              | 3/18 (17)                                           | 1.7 (0.5 - 5.5)       | 0.41      |
| Thailand                              | 2/31 (6)                                            | 1.0 (0.2 - 4.1)       | 0.96      |
| Tanzania                              | 4/65 (6)                                            | 0.8 (0.3 - 2.3)       | 0.7       |
| Zambia                                | 1/21 (5)                                            | 0.8 (0.1 - 5.7)       | 0.79      |
| Zimbabwe                              | 3/51 (6)                                            | 0.2 (0.0 - 0.6)       | 0.004     |

7  
8

**b.**

| Variable                              | N unfavorable/ N assessable (%)                     | Hazard Ratio (95% CI) | P value   |
|---------------------------------------|-----------------------------------------------------|-----------------------|-----------|
| 144 (6 doses per week)                | 50/533 (9)                                          | Reference             | Reference |
| 112-143 (on average 5 doses per week) | 13/65 (20)                                          | 2.4 (1.2 - 4.8)       | 0.02      |
| Treatment duration (per week)         | < 169 days, 21/155 (14%)<br>≥ 169 days, 42/443 (9%) | 0.7 (0.5 - 0.9)       | 0.002     |
| South Africa                          | 21/146 (14)                                         | Reference             | Reference |
| Benin                                 | 4/86 (5)                                            | 0.3 (0.1 - 0.8)       | 0.01      |
| Guinea                                | 17/163 (10)                                         | 0.4 (0.2 - 0.7)       | 0.004     |
| Kenya                                 | 10/76 (13)                                          | 0.9 (0.4 - 1.9)       | 0.74      |
| Senegal                               | 11/127 (9)                                          | 0.5 (0.2 - 1.1)       | 0.07      |
| Zambia                                | 1/21 (5)                                            | 0.8 (0.1 - 5.7)       | 0.79      |
| Zimbabwe                              | 3/51 (6)                                            | 0.2 (0.0 - 0.6)       | 0.004     |

9

1 **Supplementary Table 8. Summary of univariate Cox proportional hazard analysis in the MITT analysis population.** Univariate  
 2 results for **a.** experimental group study participants and **b.** control group study participants. Unadjusted analysis.

3 **a.**

| Variable                               | N unfavorable/ N assessable (%)                                                 | Hazard Ratio (95% CI) | P value   |
|----------------------------------------|---------------------------------------------------------------------------------|-----------------------|-----------|
| Age (per 10 year increase)             | < 30 years: 195/990 (20)<br>≥ 30 years: 265/1007 (26)                           | 1.1 (1.0 - 1.2)       | 0.002     |
| BMI (per 5 kg/m <sup>2</sup> decrease) | ≥ 17 kg/m <sup>2</sup> : 320/1472 (22)<br>< 17 kg/m <sup>2</sup> : 142/529 (27) | 1.2 (1.0 - 1.4)       | 0.08      |
| Cavitation absent                      | 125/627 (20)                                                                    | Reference             | Reference |
| Cavitation present                     | 300/1247 (24)                                                                   | 1.2 (1.0 - 1.5)       | 0.05      |
| HIV negative                           | 387/1748 (22)                                                                   | Reference             | Reference |
| HIV positive                           | 73/248 (29)                                                                     | 1.4 (1.1 - 1.8)       | 0.009     |
| Female                                 | 100/592 (17)                                                                    | Reference             | Reference |
| Male                                   | 362/1409 (26)                                                                   | 1.6 (1.3 - 2.0)       | <0.001    |
| Adherence 100%                         | 313/1572 (20)                                                                   | Reference             | Reference |
| Adherence > 90% and <100%              | 77/335 (23)                                                                     | 1.2 (0.9 - 1.5)       | 0.14      |
| Adherence ≤ 90%                        | 32/54 (59)                                                                      | 4.8 (3.3 - 6.9)       | <0.001    |
| African race                           | 294/1326 (22)                                                                   | Reference             | Reference |
| Asian race                             | 90/349 (26)                                                                     | 1.2 (1.0 - 1.6)       | 0.08      |
| Other race                             | 78/326 (24)                                                                     | 1.1 (0.9 - 1.4)       | 0.44      |
| Smear neg. or 1+                       | 88/483 (18)                                                                     | Reference             | Reference |
| Smear 2+                               | 108/503 (21)                                                                    | 1.2 (0.9 - 1.6)       | 0.24      |
| Smear 3+                               | 259/988 (26)                                                                    | 1.5 (1.2 - 1.9)       | 0.001     |
| Month 2 culture negative               | 248/1478 (17)                                                                   | Reference             | Reference |
| Month 2 culture positive               | 115/336 (34)                                                                    | 2.3 (1.9 - 2.9)       | <0.001    |

4  
 5 **b.**

| Variable | N unfavorable/ N assessable (%) | Hazard Ratio (95% CI) | P value |
|----------|---------------------------------|-----------------------|---------|
|----------|---------------------------------|-----------------------|---------|

|                                        |                                                                                |                 |           |
|----------------------------------------|--------------------------------------------------------------------------------|-----------------|-----------|
| Age (per 10 year increase)             | < 30 years: 98/708 (14)<br>≥ 30 years: 130/695 (19)                            | 1.3 (1.1 - 1.4) | <0.001    |
| BMI (per 5 kg/m <sup>2</sup> decrease) | ≥ 17 kg/m <sup>2</sup> : 166/1052 (16)<br>< 17 kg/m <sup>2</sup> : 62/352 (18) | 1.2 (1.0 - 1.6) | 0.08      |
| Cavitation absent                      | 86/484 (18)                                                                    | Reference       | Reference |
| Cavitation present                     | 133/847 (16)                                                                   | 0.9 (0.7 - 1.2) | 0.48      |
| HIV negative                           | 171/1180 (14)                                                                  | Reference       | Reference |
| HIV positive                           | 56/220 (25)                                                                    | 1.9 (1.4 - 2.5) | <0.001    |
| Female                                 | 56/415 (13)                                                                    | Reference       | Reference |
| Male                                   | 172/989 (17)                                                                   | 1.3 (1.0 - 1.8) | 0.07      |
| Adherence 100%                         | 114/1031 (11)                                                                  | Reference       | Reference |
| Adherence > 90% and <100%              | 48/274 (18)                                                                    | 1.8 (1.3 - 2.5) | <0.001    |
| Adherence ≤ 90%                        | 25/56 (45)                                                                     | 5.1 (3.3 - 7.9) | <0.001    |
| African race                           | 169/1066 (16)                                                                  | Reference       | Reference |
| Asian race                             | 33/178 (19)                                                                    | 1.4 (0.9 - 2.0) | 0.1       |
| Other race                             | 26/160 (16)                                                                    | 1.2 (0.8 - 1.8) | 0.48      |
| Smear neg. or 1+                       | 53/317 (17)                                                                    | Reference       | Reference |
| Smear 2+                               | 56/404 (14)                                                                    | 0.8 (0.5 - 1.1) | 0.22      |
| Smear 3+                               | 114/667 (17)                                                                   | 1.0 (0.7 - 1.4) | 0.94      |
| Month 2 culture negative               | 113/998 (11)                                                                   | Reference       | Reference |
| Month 2 culture positive               | 49/285 (17)                                                                    | 1.6 (1.1 - 2.2) | 0.007     |

1



1 **Supplemental Table 9. Multivariate Cox proportional hazard analysis in MITT analysis**  
 2 **population for experimental group after inclusion of cavitation status *a priori*.** Multivariate  
 3 results for **a.** baseline predictors and **b.** baseline and on-treatment predictors.

4 **a.**

| Variable                   | N unfavorable/ N assessable (%)                        | Hazard Ratio (95% CI) | P value   |
|----------------------------|--------------------------------------------------------|-----------------------|-----------|
| Female                     | 90/549 (16)                                            | Reference             | Reference |
| Male                       | 326/1294 (25)                                          | 1.6 (1.3 - 2.1)       | <0.001    |
| Smear neg. or 1+           | 81/443 (18)                                            | Reference             | Reference |
| Smear 2+                   | 104/481 (22)                                           | 1.2 (0.9 - 1.7)       | 0.18      |
| Smear 3+                   | 231/919 (25)                                           | 1.4 (1.1 - 1.9)       | 0.009     |
| HIV negative               | 352/1615 (22)                                          | Reference             | Reference |
| HIV positive               | 64/228 (28)                                            | 1.4 (1.1 - 1.9)       | 0.01      |
| Age (per 10 year increase) | < 30 years, 179/916 (20%)<br>≥ 30 years, 237/927 (26%) | 1.1 (1.0 - 1.2)       | 0.01      |
| Cavitation absent          | 122/617 (20)                                           | Reference             | Reference |
| Cavitation present         | 294/1226 (24)                                          | 1.0 (0.8 - 1.3)       | 0.75      |
| South Africa               | 192/770 (25)                                           | Reference             | Reference |
| Benin                      | 29/120 (24)                                            | 1.0 (0.6 - 1.5)       | 0.82      |
| Botswana                   | 2/11 (18)                                              | 0.8 (0.2 - 3.1)       | 0.71      |
| China                      | 3/12 (25)                                              | 1.3 (0.4 - 4.2)       | 0.62      |
| Guinea                     | 24/188 (13)                                            | 0.5 (0.3 - 0.8)       | 0.004     |
| India                      | 45/182 (25)                                            | 1.1 (0.8 - 1.5)       | 0.67      |
| Kenya                      | 30/151 (20)                                            | 0.8 (0.5 - 1.2)       | 0.2       |
| Malaysia                   | 17/43 (40)                                             | 2.0 (1.2 - 3.3)       | 0.008     |
| Senegal                    | 29/127 (23)                                            | 0.8 (0.6 - 1.2)       | 0.34      |
| Thailand                   | 7/65 (11)                                              | 0.4 (0.2 - 0.9)       | 0.02      |
| Tanzania                   | 17/91 (19)                                             | 0.8 (0.5 - 1.2)       | 0.27      |
| Zambia                     | 9/26 (35)                                              | 1.3 (0.7 - 2.6)       | 0.41      |
| Zimbabwe                   | 12/57 (21)                                             | 0.8 (0.4 - 1.4)       | 0.37      |

5 **b.**  
6

| Variable                  | N unfavorable/ N assessable (%) | Hazard Ratio (95% CI) | P value   |
|---------------------------|---------------------------------|-----------------------|-----------|
| Adherence 100%            | 238/1348 (18)                   | Reference             | Reference |
| Adherence > 90% and <100% | 64/288 (22)                     | 1.4 (1.0 - 1.9)       | 0.02      |
| Adherence ≤ 90%           | 15/32 (47)                      | 5.7 (3.3 - 9.9)       | <0.001    |
| Month 2 culture negative  | 212/1357 (16)                   | Reference             | Reference |
| Month 2 culture positive  | 105/311 (34)                    | 2.2 (1.7 - 2.9)       | <0.001    |
| Females                   | 64/492 (13)                     | Reference             | Reference |
| Males                     | 253/1176 (22)                   | 1.6 (1.2 - 2.1)       | <0.001    |
| Smear neg. or 1+          | 53/388 (14)                     | Reference             | Reference |

|                                        |                                                                                  |                 |           |
|----------------------------------------|----------------------------------------------------------------------------------|-----------------|-----------|
| Smear 2+                               | 72/430 (17)                                                                      | 1.2 (0.8 - 1.7) | 0.42      |
| Smear 3+                               | 192/850 (23)                                                                     | 1.6 (1.2 - 2.3) | 0.002     |
| HIV negative                           | 270/1463 (18)                                                                    | Reference       | Reference |
| HIV positive                           | 47/205 (23)                                                                      | 1.5 (1.1 - 2.0) | 0.02      |
| BMI (per 5 kg/m <sup>2</sup> decrease) | ≥ 17 kg/m <sup>2</sup> , 226/1247 (18%)<br>< 17 kg/m <sup>2</sup> , 91/421 (22%) | 1.4 (1.1 - 1.7) | 0.007     |
| Age (per 10 year increase)             | < 30 years, 136/830 (16%)<br>≥ 30 years, 181/838 (22%)                           | 1.1 (1.0 - 1.2) | 0.04      |
| Cavitation absent                      | 86/556 (15)                                                                      | Reference       | Reference |
| Cavitation present                     | 231/1112 (21)                                                                    | 1.0 (0.8 - 1.4) | 0.85      |
| South Africa                           | 150/702 (21)                                                                     | Reference       | Reference |
| Benin                                  | 19/107 (18)                                                                      | 0.9 (0.5 - 1.5) | 0.61      |
| Botswana                               | 2/11 (18)                                                                        | 1.2 (0.3 - 4.8) | 0.81      |
| China                                  | 2/10 (20)                                                                        | 1.4 (0.3 - 5.8) | 0.64      |
| Guinea                                 | 17/174 (10)                                                                      | 0.5 (0.3 - 0.8) | 0.006     |
| India                                  | 25/129 (19)                                                                      | 1.0 (0.6 - 1.6) | 0.99      |
| Kenya                                  | 26/145 (18)                                                                      | 1.0 (0.6 - 1.5) | 0.89      |
| Malaysia                               | 13/39 (33)                                                                       | 2.4 (1.3 - 4.4) | 0.003     |
| Senegal                                | 26/123 (21)                                                                      | 1.0 (0.6 - 1.6) | 0.96      |
| Thailand                               | 6/64 (9)                                                                         | 0.6 (0.3 - 1.3) | 0.2       |
| Tanzania                               | 12/84 (14)                                                                       | 0.7 (0.4 - 1.3) | 0.24      |
| Zambia                                 | 9/25 (36)                                                                        | 1.8 (0.9 - 3.6) | 0.09      |
| Zimbabwe                               | 10/55 (18)                                                                       | 0.8 (0.4 - 1.5) | 0.51      |

1

1 **Supplemental Table 10. Multivariate Cox proportional hazard analysis in MITT analysis**  
 2 **population for control group after inclusion of cavitation status *a priori*.** Multivariate results for  
 3 **a. baseline predictors and b. baseline and on-treatment predictors.**

4 **a.**

| Variable                               | N unfavorable/ N assessable (%)                                                 | Hazard Ratio (95% CI) | P value   |
|----------------------------------------|---------------------------------------------------------------------------------|-----------------------|-----------|
| HIV negative                           | 159/1103 (14)                                                                   | Reference             | Reference |
| HIV positive                           | 54/208 (26)                                                                     | 2.3 (1.7 - 3.3)       | <0.001    |
| Female                                 | 47/381 (12)                                                                     | Reference             | Reference |
| Male                                   | 166/930 (18)                                                                    | 1.5 (1.0 - 2.1)       | 0.03      |
| Age (per 10 year increase)             | < 30 years, 92/657 (14%)<br>≥ 30 years, 121/654 (19%)                           | 1.3 (1.1 - 1.4)       | <0.001    |
| BMI (per 5 kg/m <sup>2</sup> decrease) | ≥ 17 kg/m <sup>2</sup> , 156/989 (16%)<br>< 17 kg/m <sup>2</sup> , 57/322 (18%) | 1.3 (1.0 - 1.7)       | 0.05      |
| Cavitation absent                      | 84/477 (18)                                                                     | Reference             | Reference |
| Cavitation present                     | 129/834 (15)                                                                    | 1.1 (0.8 - 1.5)       | 0.67      |
| South Africa                           | 80/491 (16)                                                                     | Reference             | Reference |
| Benin                                  | 25/106 (24)                                                                     | 1.5 (0.9 - 2.4)       | 0.16      |
| Botswana                               | 0/11 (0)                                                                        | NA                    | NA        |
| China                                  | 0/8 (0)                                                                         | NA                    | NA        |
| Guinea                                 | 32/179 (18)                                                                     | 1.3 (0.8 - 2.1)       | 0.31      |
| India                                  | 18/93 (19)                                                                      | 1.5 (0.9 - 2.6)       | 0.15      |
| Kenya                                  | 18/115 (16)                                                                     | 1.1 (0.6 - 1.9)       | 0.7       |
| Malaysia                               | 5/19 (26)                                                                       | 2.4 (1.0 - 6.1)       | 0.06      |
| Senegal                                | 16/137 (12)                                                                     | 0.7 (0.4 - 1.3)       | 0.31      |
| Thailand                               | 5/34 (15)                                                                       | 1.0 (0.4 - 2.5)       | 1         |
| Tanzania                               | 4/53 (8)                                                                        | 0.5 (0.2 - 1.4)       | 0.19      |
| Zambia                                 | 1/18 (6)                                                                        | 0.3 (0.0 - 2.3)       | 0.26      |
| Zimbabwe                               | 9/47 (19)                                                                       | 1.3 (0.6 - 2.6)       | 0.48      |

5 **b.**  
6

| Variable                  | N unfavorable/ N assessable (%) | Hazard Ratio (95% CI) | P value   |
|---------------------------|---------------------------------|-----------------------|-----------|
| Adherence 100%            | 85/913 (9)                      | Reference             | Reference |
| Adherence > 90% and <100% | 37/230 (16)                     | 2.4 (1.6 - 3.6)       | <0.001    |
| Adherence ≤ 90%           | 16/43 (37)                      | 6.1 (3.4 - 11.0)      | <0.001    |
| HIV negative              | 98/999 (10)                     | Reference             | Reference |
| HIV positive              | 40/187 (21)                     | 3.2 (2.1 - 4.9)       | <0.001    |
| Month 2 culture negative  | 93/922 (10)                     | Reference             | Reference |
| Month 2 culture positive  | 45/264 (17)                     | 1.8 (1.2 - 2.7)       | 0.002     |

|                                        |                                                                                 |                  |           |
|----------------------------------------|---------------------------------------------------------------------------------|------------------|-----------|
| BMI (per 5 kg/m <sup>2</sup> decrease) | ≥ 17 kg/m <sup>2</sup> , 102/901 (11%)<br>< 17 kg/m <sup>2</sup> , 36/285 (13%) | 1.4 (1.0 - 2.0)  | 0.05      |
| Females                                | 30/347 (9)                                                                      | Reference        | Reference |
| Males                                  | 108/839 (13)                                                                    | 1.5 (1.0 - 2.4)  | 0.05      |
| Cavitation absent                      | 47/430 (11)                                                                     | Reference        | Reference |
| Cavitation present                     | 91/756 (12)                                                                     | 1.5 (1.0 - 2.4)  | 0.06      |
| South Africa                           | 57/454 (13)                                                                     | Reference        | Reference |
| Benin                                  | 13/90 (14)                                                                      | 1.9 (0.9 - 3.9)  | 0.08      |
| Botswana                               | 0/7 (0)                                                                         | NA               | NA        |
| China                                  | 0/7 (0)                                                                         | NA               | NA        |
| Guinea                                 | 21/164 (13)                                                                     | 1.3 (0.7 - 2.4)  | 0.39      |
| India                                  | 7/68 (10)                                                                       | 1.4 (0.6 - 3.3)  | 0.39      |
| Kenya                                  | 14/110 (13)                                                                     | 2.0 (1.0 - 3.9)  | 0.04      |
| Malaysia                               | 3/17 (18)                                                                       | 3.2 (1.0 - 10.6) | 0.05      |
| Senegal                                | 12/128 (9)                                                                      | 1.2 (0.6 - 2.3)  | 0.68      |
| Thailand                               | 2/31 (6)                                                                        | 1.0 (0.2 - 4.3)  | 0.97      |
| Tanzania                               | 4/52 (8)                                                                        | 0.8 (0.3 - 2.3)  | 0.7       |
| Zambia                                 | 1/18 (6)                                                                        | 0.7 (0.1 - 5.1)  | 0.72      |
| Zimbabwe                               | 4/40 (10)                                                                       | 0.5 (0.2 - 1.5)  | 0.22      |

1

1 **Supplemental Table 11. Multivariate Cox proportional hazard analysis with all confirmed**  
2 **reinfections classified as an unfavorable outcome.** Multivariate results with baseline and on-  
3 treatment predictors for **a.** experimental group study participants and **b.** control group study  
4 participants. Similar results were observed when reinfections were classified as favorable or  
5 completely removed from the analysis.  
6 **a.**

| Variable                               | N unfavorable/ N assessable (%)                                                 | Hazard Ratio (95% CI) | P value   |
|----------------------------------------|---------------------------------------------------------------------------------|-----------------------|-----------|
| Adherence 100%                         | 256/1366 (19)                                                                   | Reference             | Reference |
| Adherence >90% and <100%               | 75/299 (25)                                                                     | 1.5 (1.2 - 2.0)       | 0.003     |
| Adherence ≤ 90%                        | 15/32 (47)                                                                      | 5.6 (3.2 - 9.6)       | <0.001    |
| Month 2 culture negative               | 232/1377 (17)                                                                   | Reference             | Reference |
| Month 2 culture positive               | 114/320 (36)                                                                    | 2.2 (1.7 - 2.8)       | <0.001    |
| Smear neg. or 1+                       | 61/396 (15)                                                                     | Reference             | Reference |
| Smear 2+                               | 78/436 (18)                                                                     | 1.1 (0.8 - 1.6)       | 0.52      |
| Smear 3+                               | 207/865 (24)                                                                    | 1.6 (1.2 - 2.1)       | 0.003     |
| Female                                 | 72/500 (14)                                                                     | Reference             | Reference |
| Male                                   | 274/1197 (23)                                                                   | 1.5 (1.2 - 2.0)       | 0.002     |
| BMI (per 5 kg/m <sup>2</sup> decrease) | ≥ 17 kg/m <sup>2</sup> : 246/1267 (19)<br>< 17 kg/m <sup>2</sup> : 100/430 (23) | 1.3 (1.1 - 1.6)       | 0.01      |
| Age (per 10 year increase)             | < 30 years: 150/844 (18)<br>≥ 30 years: 196/853 (23)                            | 1.1 (1.0 - 1.2)       | 0.03      |
| South Africa                           | 160/712 (22)                                                                    | Reference             | Reference |
| Benin                                  | 19/107 (18)                                                                     | 0.8 (0.5 - 1.3)       | 0.36      |
| Botswana                               | 2/11 (18)                                                                       | 1.1 (0.3 - 4.4)       | 0.92      |
| China                                  | 2/10 (20)                                                                       | 1.1 (0.3 - 4.7)       | 0.85      |
| Guinea                                 | 17/174 (10)                                                                     | 0.4 (0.2 - 0.7)       | <0.001    |
| India                                  | 36/140 (26)                                                                     | 1.2 (0.8 - 1.8)       | 0.3       |
| Kenya                                  | 26/145 (18)                                                                     | 0.9 (0.6 - 1.4)       | 0.63      |
| Malaysia                               | 13/39 (33)                                                                      | 2.1 (1.2 - 3.8)       | 0.01      |
| Senegal                                | 26/123 (21)                                                                     | 0.9 (0.6 - 1.4)       | 0.71      |
| Thailand                               | 9/67 (13)                                                                       | 0.7 (0.4 - 1.5)       | 0.4       |
| Tanzania                               | 15/87 (17)                                                                      | 0.8 (0.5 - 1.4)       | 0.44      |
| Zambia                                 | 10/26 (38)                                                                      | 1.7 (0.9 - 3.3)       | 0.09      |
| Zimbabwe                               | 11/56 (20)                                                                      | 0.8 (0.4 - 1.6)       | 0.57      |

7  
8  
9

## 1 b.†

| Variable                                | N unfavorable/ N assessable (%)                                               | Hazard Ratio (95% CI) | P value   |
|-----------------------------------------|-------------------------------------------------------------------------------|-----------------------|-----------|
| Adherence 100%                          | 93/921 (10)                                                                   | Reference             | Reference |
| Adherence >90% and <100%                | 41/234 (18)                                                                   | 2.3 (1.6 - 3.4)       | <0.001    |
| Adherence ≤ 90%                         | 16/43 (37)                                                                    | 5.5 (3.1 - 9.7)       | <0.001    |
| HIV negative                            | 109/1010 (11)                                                                 | Reference             | Reference |
| HIV positive                            | 41/188 (22)                                                                   | 2.8 (1.8 - 4.1)       | <0.001    |
| Month 2 culture negative                | 100/929 (11)                                                                  | Reference             | Reference |
| Month 2 culture positive                | 50/269 (19)                                                                   | 1.8 (1.3 - 2.7)       | 0.001     |
| BMI ( per 5 kg/m <sup>2</sup> decrease) | ≥ 17 kg/m <sup>2</sup> : 109/908 (12)<br>< 17 kg/m <sup>2</sup> : 41/290 (14) | 1.5 (1.0 - 2.0)       | 0.03      |
| Female                                  | 33/350 (9)                                                                    | Reference             | Reference |
| Male                                    | 117/848 (14)                                                                  | 1.5 (1.0 - 2.3)       | 0.05      |
| South Africa                            | 63/460 (14)                                                                   | Reference             | Reference |
| Benin                                   | 13/90 (14)                                                                    | 1.3 (0.7 - 2.4)       | 0.48      |
| Botswana                                | 0/7 (0)                                                                       | NA                    | NA        |
| China                                   | 0/7 (0)                                                                       | NA                    | NA        |
| Guinea                                  | 21/164 (13)                                                                   | 0.9 (0.5 - 1.5)       | 0.68      |
| India                                   | 9/70 (13)                                                                     | 1.5 (0.7 - 3.1)       | 0.3       |
| Kenya                                   | 14/110 (13)                                                                   | 1.4 (0.8 - 2.6)       | 0.29      |
| Malaysia                                | 3/17 (18)                                                                     | 2.5 (0.8 - 8.2)       | 0.12      |
| Senegal                                 | 12/128 (9)                                                                    | 1.0 (0.5 - 1.9)       | 0.9       |
| Thailand                                | 2/31 (6)                                                                      | 0.8 (0.2 - 3.5)       | 0.82      |
| Tanzania                                | 7/55 (13)                                                                     | 1.2 (0.5 - 2.6)       | 0.69      |
| Zambia                                  | 1/18 (6)                                                                      | 0.5 (0.1 - 3.9)       | 0.54      |
| Zimbabwe                                | 5/41 (12)                                                                     | 0.5 (0.2 - 1.4)       | 0.19      |

2

1 **Supplemental Table 12. Univariate Cox proportional hazard analysis for merged MGIT and LJ culture data (as used in primary**  
 2 **analysis)\*, MGIT data only, and LJ data only in the MITT analysis population.** Univariate results for **a.** experimental group study  
 3 participants and **b.** control group study participants. Unadjusted analysis.

4  
5

**a.**

| <b>Variable</b>                          | <b>N unfavorable/ N assessable (%)</b> | <b>Hazard Ratio (95% CI)</b> | <b>P value</b> |
|------------------------------------------|----------------------------------------|------------------------------|----------------|
| Month 2 culture negative*                | 248/1478 (17)                          | Reference                    | Reference      |
| Month 2 culture positive*                | 115/336 (34)                           | 2.3 (1.9 - 2.9)              | <0.001         |
| Month 2 culture negative- MGIT data only | 77/583 (13)                            | Reference                    | Reference      |
| Month 2 culture positive-MGIT data only  | 141/508 (28)                           | 2.3 (1.7 - 3.0)              | <0.001         |
| Month 2 culture negative- LJ data only   | 233/1386 (17)                          | Reference                    | Reference      |
| Month 2 culture positive-LJ data only    | 106/319 (33)                           | 2.2 (1.8 - 2.8)              | <0.001         |

6  
7

**b.**

| <b>Variable</b>                          | <b>N unfavorable/ N assessable (%)</b> | <b>Hazard Ratio (95% CI)</b> | <b>P value</b> |
|------------------------------------------|----------------------------------------|------------------------------|----------------|
| Month 2 culture negative*                | 113/998 (11)                           | Reference                    | Reference      |
| Month 2 culture positive*                | 49/285 (17)                            | 1.6 (1.1 - 2.2)              | 0.007          |
| Month 2 culture negative- MGIT data only | 24/310 (8)                             | Reference                    | Reference      |
| Month 2 culture positive-MGIT data only  | 42/296 (14)                            | 1.9 (1.1 - 3.1)              | 0.02           |
| Month 2 culture negative- LJ data only   | 108/915 (12)                           | Reference                    | Reference      |
| Month 2 culture positive-LJ data only    | 43/261 (16)                            | 1.5 (1.0 - 2.1)              | 0.04           |

8 \* Culture positivity on either media was used for analyses with preference for solid culture if available.
